# Supplementary material
Source: PubMed Central journal article supplement (PMC6482925)
Supplement: JB.00801-18-s0001.pdf [file JB.00801-18-s0001.pdf]

## SUPPLEMENTARY MATERIAL

### **A bifunctional UDP-sugar 4-epimerase supports biosynthesis of multiple cell surface polysaccharides in *Sinorhizobium meliloti***

Simon Schäper<sup>1,2</sup>, Heiko Wendt<sup>1,2</sup>, Jan Bamberger<sup>1,3</sup>, Volker Sieber<sup>4</sup>, Jochen Schmid<sup>5</sup>, Anke Becker<sup>1,2</sup>

<sup>1</sup>LOEWE Center for Synthetic Microbiology (SYNMIKRO), Philipps University Marburg, Marburg, Germany;

<sup>2</sup>Faculty of Biology, Philipps University Marburg, Marburg, Germany;

<sup>3</sup>Faculty of Chemistry, Philipps University Marburg, Marburg, Germany;

<sup>4</sup>Chemistry of Biogenic Resources, Technical University of Munich, Campus Straubing for Biotechnology and Sustainability, Straubing, Germany;

<sup>5</sup>Bioprocess Engineering, Technical University of Munich, Campus Straubing for Biotechnology and Sustainability, Straubing, Germany

## Media compositions

**TY medium** (5 g/l tryptone, 3 g/l yeast extract, 0.4 g/l  $\text{CaCl}_2 \times 2\text{H}_2\text{O}$ ).

**LB medium** (10 g/l tryptone, 5 g/l yeast extract, 5 g/l NaCl).

**MOPS-buffered minimal medium (MM)** (10 g/l MOPS, 10 g/l mannitol, 3.55 g/l sodium glutamate, 0.246 g/l  $\text{MgSO}_4 \times 7\text{H}_2\text{O}$ , 0.25 mM  $\text{CaCl}_2$ , 2 mM  $\text{K}_2\text{HPO}_4$ , 10 mg/l  $\text{FeCl}_3 \times 6\text{H}_2\text{O}$ , 1 mg/l biotin, 3 mg/l  $\text{H}_3\text{BO}_3$ , 2.23 mg/l  $\text{MnSO}_4 \times \text{H}_2\text{O}$ , 0.287 mg/l  $\text{ZnSO}_4 \times 7\text{H}_2\text{O}$ , 0.125 mg/l  $\text{CuSO}_4 \times 5\text{H}_2\text{O}$ , 0.065 mg/l  $\text{CoCl}_2 \times 6\text{H}_2\text{O}$ , 0.12 mg/l  $\text{Na}_2\text{MoO}_4 \times 2\text{H}_2\text{O}$ , pH 7.2).

## Supplementary tables

**Table S1. Strains and plasmids used in this study.**

| Strain                                                 | Properties                                                                                                                                                                                                                                        | Reference           |
|--------------------------------------------------------|---------------------------------------------------------------------------------------------------------------------------------------------------------------------------------------------------------------------------------------------------|---------------------|
| <b><i>S. meliloti</i></b>                              |                                                                                                                                                                                                                                                   |                     |
| Rm2011                                                 | wild type, Str <sup>r</sup>                                                                                                                                                                                                                       | 1                   |
| $\Delta$ exoB                                          | Rm2011 with markerless deletion of <i>exoB</i>                                                                                                                                                                                                    | 2                   |
| Rm2011 $\Delta$ XVI                                    | Rm2011 with 16 deletions of GGDEF domain-encoding genes (c-di-GMP <sup>0</sup> )                                                                                                                                                                  | 3                   |
| <i>uppE</i> <sup>-</sup>                               | Rm2011 <i>uppE</i> ::pK19mob2 $\Omega$ HMB- <i>uppE</i> , Km <sup>r</sup>                                                                                                                                                                         | 3                   |
| <i>bgsA</i> <sup>-</sup>                               | Rm2011 <i>SMb20391</i> ::pK19mob2 $\Omega$ HMB- <i>SMb20391</i> , Km <sup>r</sup>                                                                                                                                                                 | This work           |
| $\Delta$ exoP-Z                                        | Rm2011 with markerless deletion of the <i>exo</i> gene cluster from <i>exoP</i> to <i>exoZ</i>                                                                                                                                                    | This work           |
| $\Delta$ exoP-Z <i>wgeB</i> <sup>-</sup>               | $\Delta$ exoP-Z <i>wgeB</i> ::pK18mob2- <i>wgeB</i> -mCh, Km <sup>r</sup>                                                                                                                                                                         | This work           |
| $\Delta$ exoP-Z <i>wgeB</i> <sup>-</sup>               | $\Delta$ exoP-Z <i>wgeB</i> ::pK18mob2- <i>wgeB</i> -mCh with markerless deletion of                                                                                                                                                              | This work           |
| $\Delta$ uxs1- <i>apsH2</i>                            | the APS biosynthesis gene cluster ( <i>uxs1-apsH2</i> ), Km <sup>r</sup>                                                                                                                                                                          |                     |
| $\Delta$ uxs1- <i>apsH2</i>                            | Rm2011 with markerless deletion of the APS biosynthesis gene cluster ( <i>uxs1-apsH2</i> )                                                                                                                                                        | This work           |
| $\Delta$ exoB <i>uxe</i> <sup>-</sup>                  | $\Delta$ exoB <i>uxe</i> ::pK19mob2 $\Omega$ HMB- <i>uxe</i> , Km <sup>r</sup>                                                                                                                                                                    | This work           |
| $\Delta$ uxs1                                          | Rm2011 with markerless deletion of <i>uxs1</i>                                                                                                                                                                                                    | This work           |
| $\Delta$ uxe                                           | Rm2011 with markerless deletion of <i>uxe</i>                                                                                                                                                                                                     | This work           |
| $\Delta$ apsS                                          | Rm2011 with markerless deletion of <i>SMb20460</i> ( <i>apsS</i> )                                                                                                                                                                                | This work           |
| $\Delta$ apsH1                                         | Rm2011 with markerless deletion of <i>SMb20461</i> ( <i>apsH1</i> )                                                                                                                                                                               | This work           |
| $\Delta$ apsE                                          | Rm2011 with markerless deletion of <i>SMb20462</i> ( <i>apsE</i> )                                                                                                                                                                                | This work           |
| $\Delta$ apsH2                                         | Rm2011 with markerless deletion of <i>SMb20463</i> ( <i>apsH2</i> )                                                                                                                                                                               | This work           |
| $\Delta$ apsH1 $\Delta$ apsH2                          | Rm2011 with markerless deletions of <i>SMb20461</i> ( <i>apsH1</i> ) and <i>SMb20463</i> ( <i>apsH2</i> )                                                                                                                                         | This work           |
| $\Delta$ uxs1 <i>uppE</i> <sup>-</sup>                 | $\Delta$ uxs1 <i>uppE</i> ::pK19mob2 $\Omega$ HMB- <i>uppE</i> , Km <sup>r</sup>                                                                                                                                                                  | This work           |
| $\Delta$ uxe <i>uppE</i> <sup>-</sup>                  | $\Delta$ uxe <i>uppE</i> ::pK19mob2 $\Omega$ HMB- <i>uppE</i> , Km <sup>r</sup>                                                                                                                                                                   | This work           |
| $\Delta$ apsS <i>uppE</i> <sup>-</sup>                 | $\Delta$ apsS <i>uppE</i> ::pK19mob2 $\Omega$ HMB- <i>uppE</i> , Km <sup>r</sup>                                                                                                                                                                  | This work           |
| $\Delta$ apsH1 <i>uppE</i> <sup>-</sup>                | $\Delta$ apsH1 <i>uppE</i> ::pK19mob2 $\Omega$ HMB- <i>uppE</i> , Km <sup>r</sup>                                                                                                                                                                 | This work           |
| $\Delta$ apsE <i>uppE</i> <sup>-</sup>                 | $\Delta$ apsE <i>uppE</i> ::pK19mob2 $\Omega$ HMB- <i>uppE</i> , Km <sup>r</sup>                                                                                                                                                                  | This work           |
| $\Delta$ apsH2 <i>uppE</i> <sup>-</sup>                | $\Delta$ apsH2 <i>uppE</i> ::pK19mob2 $\Omega$ HMB- <i>uppE</i> , Km <sup>r</sup>                                                                                                                                                                 | This work           |
| $\Delta$ apsH1 $\Delta$ apsH2 <i>uppE</i> <sup>-</sup> | $\Delta$ apsH1 $\Delta$ apsH2 <i>uppE</i> ::pK19mob2 $\Omega$ HMB- <i>uppE</i> , Km <sup>r</sup>                                                                                                                                                  | This work           |
| $\Delta$ uxs1- <i>apsH2</i> <i>uppE</i> <sup>-</sup>   | $\Delta$ uxs1- <i>apsH2</i> <i>uppE</i> ::pK19mob2 $\Omega$ HMB- <i>uppE</i> , Km <sup>r</sup>                                                                                                                                                    | This work           |
| $\Delta$ cuxR                                          | Rm2011 with markerless deletion of <i>cuxR</i>                                                                                                                                                                                                    | This work           |
| $\Delta$ cuxR c-di-GMP <sup>0</sup>                    | Rm2011 $\Delta$ XVI with markerless deletion of <i>cuxR</i>                                                                                                                                                                                       | This work           |
| $\Delta$ mucR                                          | Rm2011 with markerless deletion of <i>mucR</i>                                                                                                                                                                                                    | This work           |
| $\Delta$ mucR $\Delta$ cuxR                            | $\Delta$ mucR with markerless deletion of <i>cuxR</i>                                                                                                                                                                                             | This work           |
| $\Delta$ mucR $\Delta$ cuxR c-di-GMP <sup>0</sup>      | $\Delta$ cuxR c-di-GMP <sup>0</sup> with markerless deletion of <i>mucR</i>                                                                                                                                                                       | This work           |
| Rm2011 <i>P<sub>nptII</sub>-dgcA-cuxR</i>              | Rm2011 pSM- <i>dgcA-cuxR</i> integrated into the chromosome, Gm <sup>r</sup>                                                                                                                                                                      | This work           |
| $\Delta$ exoP-Z <i>P<sub>nptII</sub>-dgcA-cuxR</i>     | $\Delta$ exoP-Z containing pSM- <i>dgcA-cuxR</i> integrated into the chromosome, Gm <sup>r</sup>                                                                                                                                                  | This work           |
| <b><i>E. coli</i></b>                                  |                                                                                                                                                                                                                                                   |                     |
| BL21(DE3)                                              | F <sup>-</sup> <i>ompT gal dcm lon hsdS<sub>B</sub>(r<sub>B</sub><sup>-</sup>m<sub>B</sub><sup>-</sup>)</i> $\lambda$ (DE3 [ <i>lacI lacUV5-T7p07 ind1 sam7 nin5</i> ]) [ <i>malB</i> <sup>+</sup> ] <sub>K-12</sub> ( $\lambda^S$ )              | New England Biolabs |
| DH5 $\alpha$                                           | F <sup>-</sup> <i>endA1 glnV44 thi-1 recA1 relA1 gyrA96 deoR nupG purB20 <math>\phi</math>80dlacZ<math>\Delta</math>M15 <math>\Delta</math>(<i>lacZYA-argF</i>)U169, hsdR17(r<sub>K</sub><sup>-</sup>m<sub>K</sub><sup>+</sup>)</i> , $\lambda^-$ | 4                   |
| S17-1                                                  | <i>E. coli</i> 294 Thi RP4-2-Tc::Mu-Km::Tn7 integrated into the chromosome                                                                                                                                                                        | 5                   |

## Plasmids

|                             |                                                                                                                                                                       |                  |
|-----------------------------|-----------------------------------------------------------------------------------------------------------------------------------------------------------------------|------------------|
| pABC2S-mob                  | variant of mobilizable <i>repABC</i> -based mini-replicon, single-copy in <i>S. meliloti</i> , Spec <sup>r</sup>                                                      | 6                |
| pK18mobsacB                 | suicide vector, <i>lacZ</i> , <i>mob</i> , <i>sacB</i> , Km <sup>r</sup>                                                                                              | 7                |
| pR_egfp                     | reporter fusion plasmid carrying <i>P<sub>syn</sub></i> for constitutive expression, Tc <sup>r</sup>                                                                  | 8                |
| pSRK                        | pBBR1MCS-5-derived broad-host-range expression vector containing <i>lac</i> promoter lacking the <i>lacI</i> operator, Km <sup>r</sup>                                | 8                |
| pSRKGm                      | pBBR1MCS-5-derived broad-host-range expression vector containing <i>lac</i> promoter, Gm <sup>r</sup>                                                                 | 9                |
| pWBT                        | pSRKGm carrying T5 promoter, Gm <sup>r</sup>                                                                                                                          | M. McIntosh      |
| pWH844                      | expression vector carrying <i>6×his</i> and T5 promoter, Amp <sup>r</sup>                                                                                             | 10               |
| pSM10                       | <i>S. meliloti</i> integrative vector containing partial <i>recA</i> and <i>alaS</i> sequences and <i>nptII</i> promoter for constitutive expression, Gm <sup>r</sup> | 11               |
| pK19mob2ΩHMB-SMb20391       | pK19mob2ΩHMB containing internal fragment of <i>SMb20391</i> ( <i>bgsA</i> )                                                                                          | 12               |
| pK19mob2ΩHMB-uxe            | pK19mob2ΩHMB containing internal fragment of <i>uxe</i>                                                                                                               | 12               |
| pK18mob-wgeB-mCh            | pK18mob2-mCh carrying internal fragment of <i>wgeB</i>                                                                                                                | P. Charoenpanich |
| pPHU231-egfp                | broad-host-range low copy expression vector containing <i>egfp</i> , used for generating promoter- <i>egfp</i> fusions, Tc <sup>r</sup>                               | M. McIntosh      |
| pPHU231-PrpsB-egfp          | pPHU231- <i>egfp</i> containing <i>rpsB</i> promoter transcriptionally fused to <i>egfp</i>                                                                           | E. Krol          |
| pK19mob2ΩHMB-uppE           | pK19mob2ΩHMB containing internal fragment of <i>SMc01792</i> ( <i>uppE</i> )                                                                                          | 3                |
| pWBT-pleD-cuxR              | pWBT containing <i>pleD</i> and <i>cuxR</i> coding sequences                                                                                                          | 13               |
| pSRKGm-uxs1-SMb20463        | pSRKGm containing the APS biosynthesis gene cluster ( <i>uxs1-apsH2</i> )                                                                                             | 13               |
| pWH844-mucR                 | pWH844 containing <i>mucR</i> coding sequence                                                                                                                         | H. Meier         |
| pK18mobsacB-mucR            | pK18mobsacB containing flanking regions of <i>mucR</i>                                                                                                                | H. Meier         |
| pSRK-uxe                    | pSRK containing <i>uxe</i> coding sequence                                                                                                                            | This work        |
| pWH844-uxe                  | pWH844 containing <i>uxe</i> coding sequence excluding the start codon                                                                                                | This work        |
| pWH844-exoB                 | pWH844 containing <i>exoB</i> coding sequence excluding the start codon                                                                                               | This work        |
| pSRKGm-egfp                 | pSRKGm containing <i>egfp</i>                                                                                                                                         | This work        |
| pSRKGm-Puxs1-egfp           | pSRKGm containing <i>uxs1</i> promoter transcriptionally fused to <i>egfp</i>                                                                                         | This work        |
| pSRKGm-PcuxR-egfp           | pSRKGm containing <i>cuxR</i> promoter transcriptionally fused to <i>egfp</i>                                                                                         | This work        |
| pPHU231-PmucR-egfp          | pPHU231- <i>egfp</i> containing <i>mucR</i> promoter transcriptionally fused to <i>egfp</i>                                                                           | This work        |
| pSM-dgcA-cuxR               | pSM10 containing <i>dgcA</i> ( <i>C. crescentus</i> ) and <i>cuxR</i> coding sequences                                                                                | This work        |
| pABC-P <sub>syn</sub>       | pABC2S-mob containing <i>P<sub>syn</sub></i> from pR_egfp                                                                                                             | This work        |
| pABC-P <sub>syn</sub> -cuxR | pABC-P <sub>syn</sub> containing <i>cuxR</i> coding sequence                                                                                                          | This work        |
| pK18mobsacB-exoP-Z          | pK18mobsacB containing downstream flanking regions of <i>exoP</i> and <i>exoZ</i>                                                                                     | This work        |
| pK18mobsacB-uxs1            | pK18mobsacB containing flanking regions of <i>uxs1</i>                                                                                                                | This work        |
| pK18mobsacB-uxe             | pK18mobsacB containing flanking regions of <i>uxe</i>                                                                                                                 | This work        |
| pK18mobsacB-apsS            | pK18mobsacB containing flanking regions of <i>SMb20460</i> ( <i>apsS</i> )                                                                                            | This work        |
| pK18mobsacB-apsH1           | pK18mobsacB containing flanking regions of <i>SMb20461</i> ( <i>apsH1</i> )                                                                                           | This work        |
| pK18mobsacB-apsE            | pK18mobsacB containing flanking regions of <i>SMb20462</i> ( <i>apsE</i> )                                                                                            | This work        |
| pK18mobsacB-apsH2           | pK18mobsacB containing flanking regions of <i>SMb20463</i> ( <i>apsH2</i> )                                                                                           | This work        |
| pK18mobsacB-uxs1-apsH2      | pK18mobsacB containing upstream flanking region of <i>uxs1</i> and downstream flanking region of <i>SMb20463</i> ( <i>apsH2</i> )                                     | This work        |
| pK18mobsacB-cuxR            | pK18mobsacB containing flanking regions of <i>cuxR</i>                                                                                                                | This work        |
| pR-uxs1                     | pR_egfp containing <i>uxs1</i> coding sequence                                                                                                                        | This work        |
| pR-uxe                      | pR_egfp containing <i>uxe</i> coding sequence                                                                                                                         | This work        |
| pR-exoB                     | pR_egfp containing <i>exoB</i> coding sequence                                                                                                                        | This work        |
| pR-apsH1                    | pR_egfp containing <i>SMb20461</i> ( <i>apsH1</i> ) coding sequence                                                                                                   | This work        |

**Table S2. Oligonucleotides used in this study.**

| Name                                                                                                       | Sequence                                                                                                                                                           | Purpose                                                                                 |
|------------------------------------------------------------------------------------------------------------|--------------------------------------------------------------------------------------------------------------------------------------------------------------------|-----------------------------------------------------------------------------------------|
| uxe_TIR-<br>RBS_Xba_Bam_fwd<br>uxe_Nhe_rev                                                                 | ATATTCTAGAGGATCCTGATTAACCTTTATAAGGAG<br>GAAAAACATATGGTTGCGCCACGTATCCT<br>ATATGCTAGCTCATGACCGGACCTCCAGC                                                             | Construction of pSRK- <i>uxe</i> and pR- <i>uxe</i>                                     |
| uxe_-start_BamHI_fwd<br>uxe_HindIII_rev                                                                    | ATATGGATCCGTTGCGCCACGTATCCTCGT<br>ATATAAGCTTTTCATGACCGGACCTCCAGC                                                                                                   | Construction of pWH844- <i>uxe</i>                                                      |
| exoB_Bam_fwd<br>exoB_Hind_fwd                                                                              | ATATGGATCCCAGAACAACAACATTCTCGTGGTC<br>ATATAAGCTTTTCAGCCGCCCTGATTTCTG                                                                                               | Construction of pWH844- <i>exoB</i>                                                     |
| Psemb20458_Hind_f<br>Psemb20458_Xba_r                                                                      | ATATAAGCTTGCAACCTCCAGCGAAAT<br>ATATTCTAGAATAATTACCGGAATATTCCTCACAC                                                                                                 | Construction of pSRKGm- <i>Puxs1-egfp</i>                                               |
| Psemb20457_Hind_f<br>Psemb20457_Xba_r                                                                      | ATATAAGCTTGAATATTCCTCACACTATCTGCTA<br>AC<br>ATATTCTAGACTTCGTTCATGCAACCTCCA                                                                                         | Construction of pSRKGm- <i>PcuxR-egfp</i>                                               |
| Plac_NotI_fwd<br>Plac_NheI_rev                                                                             | ATATGCGGCCGCTGAAAAACGACAAAGCAGCA<br>ATATGCTAGCGGATCCGGGATC                                                                                                         | Construction of pABC- <i>P<sub>syn</sub>-cuxR</i> ;<br>pR- <i>egfp</i> used as template |
| Smb20457_NheI_fwd<br>Smb20457_ScaI_rev                                                                     | ATATGCTAGCATTAAAGAGGAGAAAGGTACCATG<br>ACGAAGGACTCCGGATCA<br>ATATAGTACTTCATCCTTGAACCGATTTGAGC                                                                       | Construction of pABC- <i>P<sub>syn</sub>-cuxR</i>                                       |
| exodel-1-f-Hind<br>exodel-1-r-Xba<br>exodel2-f-Xba<br>exodel2-r-Eco                                        | CTGAAAGCTTGCAAAGGGTTACCAACCCGTC<br>CTGTCTAGAGCGCCTTGAGGAAAAGGCT<br>CAGTCTAGATCAAGCCTTGCGGCGATCGAC<br>GAAGGAATTCTCCGACCTCGACGTGAAG                                  | Construction of pK18mobsacB- <i>exoP-Z</i>                                              |
| uxs1-750-l-E_f<br>uxs1-750-l-K_r                                                                           | ATATGAATTCTGCGAAAGAGGCCGACGTT<br>ATATGGTACCGGAATATTCCTCACACTATCTGCTA<br>AC                                                                                         | Construction of pK18mobsacB- <i>uxs1</i> and<br>pK18mobsacB- <i>uxs1-apsH2</i>          |
| uxs1-754-r-K_f<br>uxs1-754-r-S_r                                                                           | ATATGGTACCATGGTTGCGCCACGTATCCT<br>ATATCCCGGGTGAGCGCGACGTTCCCGC                                                                                                     |                                                                                         |
| uxe-762-l-E_f<br>uxe-762-l-K_r<br>uxe-771-r-K_f<br>uxe-771-r-S_r                                           | ATATGAATTCATCTATAACCTGGCCTGCCCG<br>ATATGGTACCTCAGACCAGCTCCGCACTTT<br>ATATGGTACCATGACCGTCTTTCCACCAAT<br>ATATCCCGGGGTATCCGGCCTGGAGAGCC                               | Construction of pK18mobsacB- <i>uxe</i>                                                 |
| smb20460-733-l-B_f<br>smb20460-733-l-X_r<br>smb20460-705-r-X_f<br>smb20460-705-r-P_r                       | ATATGGATCCCGCCGATCCCGCGAAATACTA<br>ATATTCTAGATCATGACCGGACCTCCAGC<br>ATATTCTAGAGAACATGAGAGTGAAAGTCCCATT<br>ATATCTGCAGGATACCCCGCGGCATATTG                            | Construction of pK18mobsacB- <i>apsS</i>                                                |
| smb20461-755-l-B_f<br>smb20461-755-l-X_r<br>smb20461-758-r-X_f<br>smb20461-758-r-P_r                       | ATATGGATCCGTTTGCAATGCCGATCATCG<br>ATATTCTAGATCTCATGTTCTATCCCCTCTCTAA<br>ATATTCTAGAATGAACAGGAAATCAAAGGCCA<br>ATATCTGCAGTTTCCGTAGTTCATCACCCGG                        | Construction of pK18mobsacB- <i>apsH1</i>                                               |
| smb20462-742-l-B_f<br>smb20462-742-l-X_r<br>smb20462-723-r-X_f                                             | ATATGGATCCGAAGAGCGCTATGCGGTGG<br>ATATTCTAGATCATTGAACACCTCCAACCGCGT<br>ATATTCTAGAATGAAATCGATATATCGAGGAATAC<br>CT                                                    | Construction of pK18mobsacB- <i>apsE</i>                                                |
| smb20462-723-r-P_r<br>smb20463-738-l-B_f<br>smb20463-738-l-X_r<br>smb20463-763-r-X_f<br>smb20463-763-r-P_r | ATATCTGCAGCACCTCGCGCTGCTTCCTT<br>ATATGGATCCGACGTGCTGTCGACGCT<br>ATATTCTAGATCACATGCCTCCATCGGG<br>ATATTCTAGACCACCGCCGGAAGGGGTT<br>ATATCTGCAGAAGGTCTGTCGAGATACCCTTCGT | Construction of pK18mobsacB- <i>apsH2</i><br>and pK18mobsacB- <i>uxs1-apsH2</i>         |
| smb20457-750-l-E_f<br>smb20457-750-l-K_r<br>smb20457-751-r-K_f<br>smb20457-751-r-S_r                       | ATATGAATTCAGCCAGATCGAGGAGTTGA<br>ATATGGTACCGCAACCTCCAGCGAAATG<br>ATATGGTACCGGGTTGAGCCGCGTACCC<br>ATATCCCGGGAGAGGCTTGCTCTGGAGGGG                                    | Construction of pK18mobsacB- <i>cuxR</i>                                                |
| uxs1_TIR-<br>RBS_Bam_fwd                                                                                   | ATATGGATCCTGATTAACCTTTATAAGGAGAAAA<br>ACATATGAATTTTTAGAAATGACTTCAGGGG                                                                                              | Construction of pR- <i>uxs1</i>                                                         |

|                              |                                                                        |                                                                                                                                                 |
|------------------------------|------------------------------------------------------------------------|-------------------------------------------------------------------------------------------------------------------------------------------------|
| uxs1_Nhe_rev                 | ATATGCTAGCTCAGACCAGCTCCGCACTTT                                         |                                                                                                                                                 |
| exoB_TIR-<br>RBS_Bam_fwd     | ATATGGATCCTGATTAACCTTTATAAGGAGGAAAA<br>ACATATGCAGAACAACAACATTCTCGTGGTC | Construction of pR- <i>exoB</i>                                                                                                                 |
| exoB_Nhe_rev                 | ATATGCTAGCTCAGCCGCCCTGATTTCTG                                          |                                                                                                                                                 |
| SMb20461_TIR-<br>RBS_Bam_fwd | ATATGGATCCTGATTAACCTTTATAAGGAGGAAAA<br>ACATATGAAAGTCCCATTCTTCGGGAA     | Construction of pR- <i>apsH1</i>                                                                                                                |
| SMb20461_Nhe_rev             | ATATGCTAGCTCATTGAACACCTCCAACCG                                         |                                                                                                                                                 |
| dgcA_TIR-<br>RBS_Sma_fwd     | ATATCCCGGGTGATTAACCTTTATAAGGAGGAAAA<br>ACATATGAAAATCTCAGGCGCCC         |                                                                                                                                                 |
| dgcA-r                       | ATATAAGCTTTCAAGCGCTCTGCGCTTG                                           | Construction of pSM- <i>dgcA-cuxR</i>                                                                                                           |
| smb20457-Hind-Xba_f          | ATATAAGCTTATTAAGAGGAGAAATCTAGAATG<br>ACGAAGGACTCCGGATCA                |                                                                                                                                                 |
| smb20457_Bam_rev             | ATATGGATCCTCATCCTTGAACCGATTTGAGC                                       |                                                                                                                                                 |
| PmucR500-HindIII_fwd         | ATATAAGCTTTATTGGCAAAGCCGCGCAT                                          | Construction of pPHU231- <i>PmucR-egfp</i>                                                                                                      |
| PmucR0-Xbal-rev              | ATATTCTAGACTCTGTCAATTTCTTCTCTATCG                                      |                                                                                                                                                 |
| rspBupHindIII                | GGCAAAGCTTGGATCTCACCATGGACTACGG                                        | Amplification of <i>rpsB</i> upstream region for EMSA; pPHU231- <i>PrpsB-egfp</i> used as template                                              |
| PmucR330-HindIII-fwd         | ATATAAGCTTGCTGCATGCCGTTAAATTTATG                                       | Amplification of <i>mucR</i> upstream region for EMSA; pPHU231- <i>PmucR-egfp</i> used as template                                              |
| Psmb20458_Hind_f             | ATATAAGCTTGCAACCCTCCAGCGAAAT                                           | Amplification of <i>cuxR-uxs1</i> intergenic region and 196 bp <i>uxs1</i> upstream region for EMSA; pSRKGm- <i>Puxs1-egfp</i> used as template |
| Psmb20458_-<br>196_Hind_f    | ATATAAGCTTTGCACGGCGGGATAACAAT                                          |                                                                                                                                                 |
| Cy3-egfp-28-rev              | TGAACAGCTCCTCGCCCTT                                                    | Cy3-labeled egfp reverse primer for amplification of DNA used in EMSA                                                                           |
| PCR1                         | CGGGCCTCTTCGCTATT                                                      | standard sequencing primer 1                                                                                                                    |
| PCR2                         | TTAGCTCACTCATTAGG                                                      | standard sequencing primer 2                                                                                                                    |
| egfp_rev                     | ACTTCAGGGTCAGCTTGCCGTA                                                 | standard sequencing primer 3                                                                                                                    |
| 405                          | GATCCGGCAAACAACACC                                                     | standard sequencing primer 4                                                                                                                    |
| 456                          | CGCTCTCTGAGTAGGACAAA                                                   | standard sequencing primer 5                                                                                                                    |

**Table S3. HPLC gradient for the fractionation of UDP-glucose and UDP-galactose.**  
 Solution A: water. Solution B: water/0.3% formic acid (pH 9). Solution C: acetonitrile.  
 Solution D: 79.95% acetonitrile/19.95% water/0.1% TFA.

| <b>Time (min)</b> | <b>Solution A (%)</b> | <b>Solution B (%)</b> | <b>Solution C (%)</b> | <b>Solution D (%)</b> |
|-------------------|-----------------------|-----------------------|-----------------------|-----------------------|
| 0                 | 53                    | 42                    | 5                     | 0                     |
| 15                | 50                    | 32.5                  | 17.5                  | 0                     |
| 15.1              | 5                     | 5                     | 90                    | 0                     |
| 22                | 5                     | 5                     | 90                    | 0                     |
| 22.1              | 5                     | 0                     | 0                     | 95                    |
| 52.1              | 5                     | 0                     | 0                     | 95                    |
| 52.2              | 53                    | 42                    | 5                     | 0                     |
| 82.2              | 53                    | 42                    | 5                     | 0                     |

## Supplementary references

1. Casse F, Boucher C, Julliot J, Michel M, Dénarié J. 1979. Identification and Characterization of Large Plasmids in *Rhizobium meliloti* using Agarose Gel Electrophoresis. *Microbiology* 113:229-242.
2. Charoenpanich P, Soto MJ, Becker A, McIntosh M. 2015. Quorum sensing restrains growth and is rapidly inactivated during domestication of *Sinorhizobium meliloti*. *Environ Microbiol Rep* 7:373-382.
3. Schäper S, Krol E, Skotnicka D, Kaever V, Hilker R, Søgaard-Andersen L, Becker A. 2016. Cyclic Di-GMP Regulates Multiple Cellular Functions in the Symbiotic Alphaproteobacterium *Sinorhizobium meliloti*. *J Bacteriol* 198:521-535.
4. Grant SG, Jessee J, Bloom FR, Hanahan D. 1990. Differential plasmid rescue from transgenic mouse DNAs into *Escherichia coli* methylation-restriction mutants. *Proc Natl Acad Sci U S A* 87:4645-4649.
5. Simon R, Priefer U, Pühler A. 1983. A broad host range mobilization system for *in vivo* genetic engineering: transposon mutagenesis in gram-negative bacteria. *Nature Biotechnology* 1:784-791.
6. Döhlemann J, Wagner M, Happel C, Carillo M, Sobetzko P, Erb TJ, Thanbichler M, Becker A. 2017. A family of single copy *repABC*-type shuttle vectors stably maintained in the alpha-proteobacterium *Sinorhizobium meliloti*. *ACS Synth Biol* 6:968-984.
7. Schäfer A, Tauch A, Jäger W, Kalinowski J, Thierbach G, Pühler A. 1994. Small mobilizable multi-purpose cloning vectors derived from the *Escherichia coli* plasmids pK18 and pK19: selection of defined deletions in the chromosome of *Corynebacterium glutamicum*. *Gene* 145:69-73.
8. Torres-Quesada O, Millán V, Nisa-Martínez R, Bardou F, Crespi M, Toro N, Jiménez-Zurdo JI. 2013. Independent activity of the homologous small regulatory RNAs AbcR1 and AbcR2 in the legume symbiont *Sinorhizobium meliloti*. *PLoS One* 8:e68147.
9. Khan SR, Gaines J, Roop RM, Farrand SK. 2008. Broad-host-range expression vectors with tightly regulated promoters and their use to examine the influence of TraR and TraM expression on Ti plasmid quorum sensing. *Appl Environ Microbiol* 74:5053-5062.
10. Schirmer F, Ehrt S, Hillen W. 1997. Expression, inducer spectrum, domain structure, and function of MopR, the regulator of phenol degradation in *Acinetobacter calcoaceticus* NCIB8250. *J Bacteriol* 179:1329-1336.
11. Selbitschka W, Dresing U, Hagen M, Niemann S, Pühler A. 1995. A biological containment system for *Rhizobium meliloti* based on the use of recombination-deficient (*recA*<sup>-</sup>) strains. *FEMS Microbiology Ecology* 16:223-232.
12. Becker A, Barnett MJ, Capela D, Dondrup M, Kamp PB, Krol E, Linke B, Rüberg S, Runte K, Schroeder BK, Weidner S, Yurgel SN, Batut J, Long SR, Pühler A, Goesmann A. 2009. A portal for rhizobial genomes: RhizoGATE integrates a *Sinorhizobium meliloti* genome annotation update with postgenome data. *J Biotechnol* 140:45-50.
13. Schäper S, Steinchen W, Krol E, Altegoer F, Skotnicka D, Søgaard-Andersen L, Bange G, Becker A. 2017. AraC-like transcriptional activator CuxR binds c-di-GMP by a PilZ-like mechanism to regulate extracellular polysaccharide production. *Proc Natl Acad Sci U S A* 114:E4822-E4831.
14. Sharypova LA, Niehaus K, Scheidle H, Holst O, Becker A. 2003. *Sinorhizobium meliloti* *acpXL* mutant lacks the C28 hydroxylated fatty acid moiety of lipid A and does not express a slow migrating form of lipopolysaccharide. *J Biol Chem* 278:12946-12954.
15. Gu X, Lee SG, Bar-Peled M. 2011. Biosynthesis of UDP-xylose and UDP-arabinose in *Sinorhizobium meliloti* 1021: first characterization of a bacterial UDP-xylose synthase, and UDP-xylose 4-epimerase. *Microbiology* 157:260-269.
16. Bahlawane C, McIntosh M, Krol E, Becker A. 2008. *Sinorhizobium meliloti* regulator MucR couples exopolysaccharide synthesis and motility. *Mol Plant Microbe Interact* 21:1498-1509.
17. Schlüter JP, Reinkensmeier J, Barnett MJ, Lang C, Krol E, Giegerich R, Long SR,



- Becker A. 2013. Global mapping of transcription start sites and promoter motifs in the symbiotic  $\alpha$ -proteobacterium *Sinorhizobium meliloti* 1021. BMC Genomics 14:156.
18. Sallet E, Roux B, Sauviac L, Jardinaud MF, Carrère S, Faraut T, de Carvalho-Niebel F, Gouzy J, Gamas P, Capela D, Bruand C, Schiex T. 2013. Next-generation annotation of prokaryotic genomes with EuGene-P: application to *Sinorhizobium meliloti* 2011. DNA Res 20:339-354.
  19. Schlüter JP, Reinkensmeier J, Daschkey S, Evguenieva-Hackenberg E, Janssen S, Jänicke S, Becker JD, Giegerich R, Becker A. 2010. A genome-wide survey of sRNAs in the symbiotic nitrogen-fixing alpha-proteobacterium *Sinorhizobium meliloti*. BMC Genomics 11:245.

## Supplementary figures

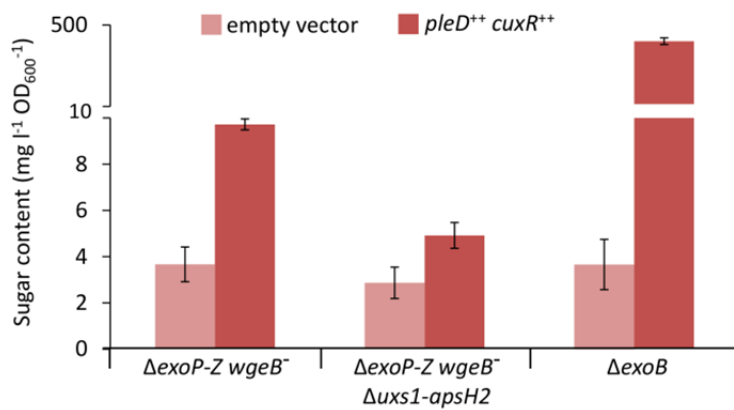

**Fig S1. Determination of total sugar content in *S. meliloti* culture supernatants.** *S. meliloti* Rm2011 mutants lacking the succinoglycan biosynthesis gene cluster ( $\Delta exoP-Z$ ), carrying a plasmid insertion inside the *wgeB* gene of the galactoglucan biosynthesis gene cluster (*wgeB*<sup>-</sup>), containing a deletion of the *exoB* gene and/or lacking the APS biosynthesis gene cluster ( $\Delta uxs1-apsH2$ ) were used to determine total sugar contents in culture supernatants. Strains harbored either empty vector pWBT or pWBT-*pleD-cuxR* and were grown in liquid MM supplemented with IPTG. Error bars represent the standard deviation of three biological replicates.

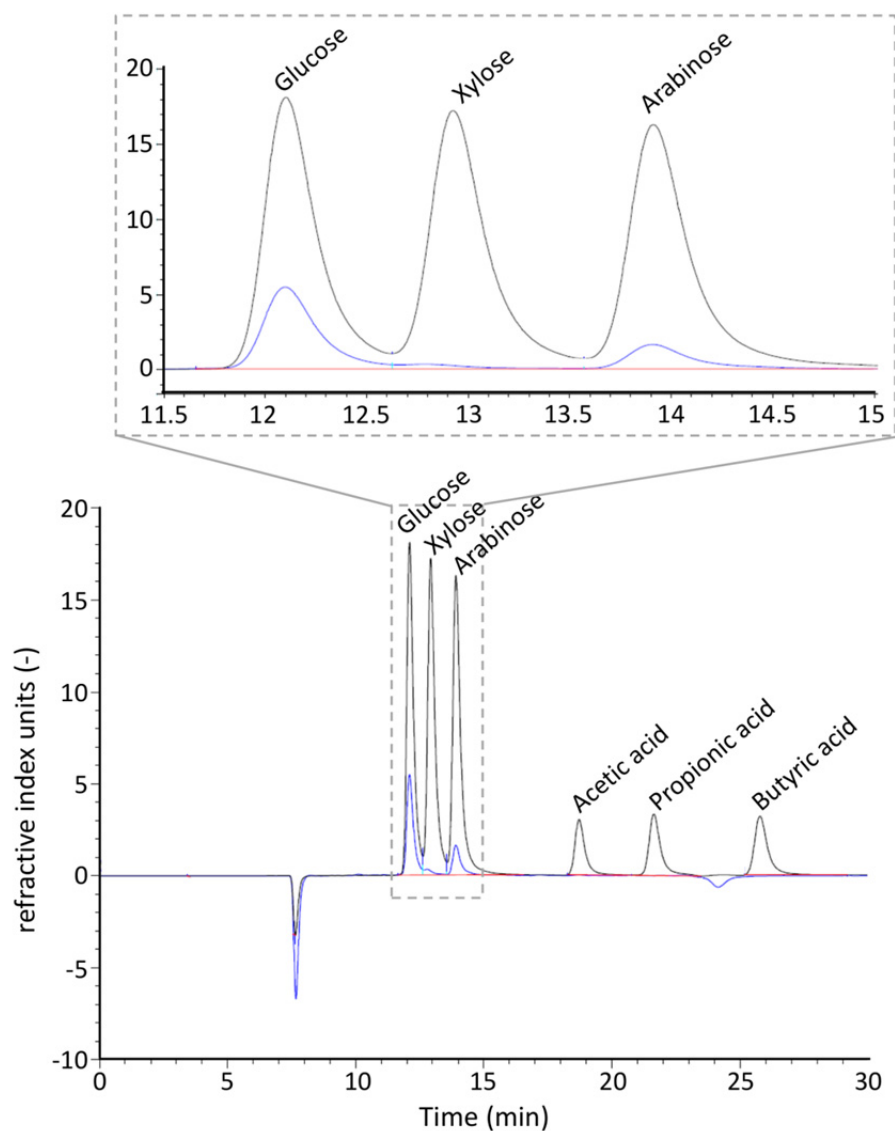

**Fig S2. Chromatogram of the APS analysis on a Rezex ROA-H<sup>+</sup> column.** An overlay of standards (glucose, xylose, and arabinose; black line) and the dialyzed APS sample (see table 1; blue line) is shown.

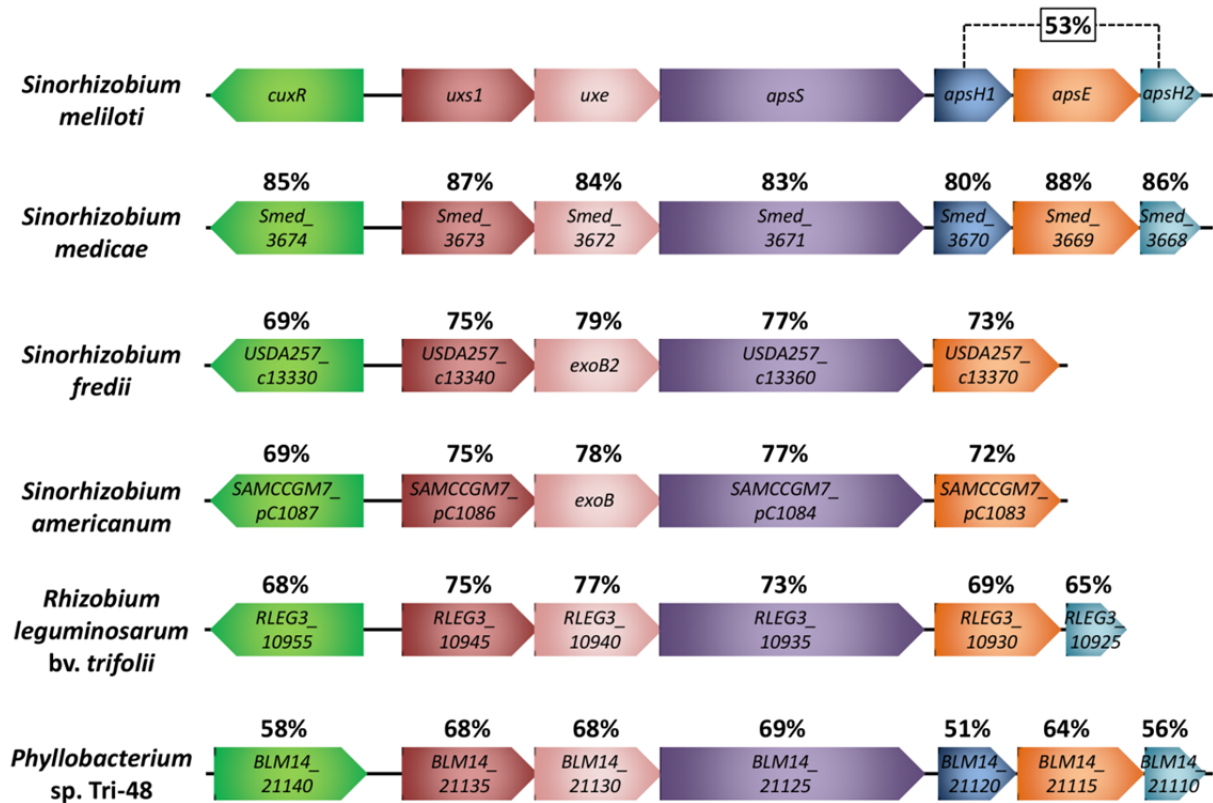

**Fig S3. Architecture and homology of the *aps* gene cluster.** Homology of the *aps* gene cluster from *S. meliloti* to gene clusters in species identified with BlastN. Percent numbers indicate nucleotide sequence identities between *S. meliloti* genes and the corresponding genes (colour-coded) from different rhizobial species. Homologs of the *S. meliloti* *cuxR* gene, encoding AraC-type transcriptional regulators encoded upstream of the *aps* gene clusters, are also shown.

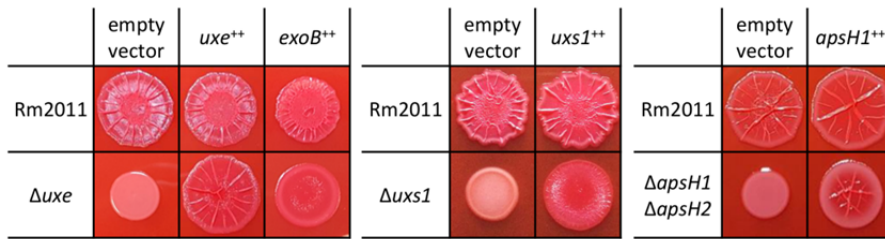

**Fig S4. Complementation of *S. meliloti* deletion strains.** *S. meliloti* Rm2011 wild type and indicated deletion strains, ectopically expressing *pleD* and *cuxR* from an IPTG-inducible promoter and harboring either empty vector pR\_egfp, pR-*uxe*, pR-*exoB*, pR-*uxs1* or pR-*apsH1*, grown on MM agar supplemented with Congo red and IPTG.

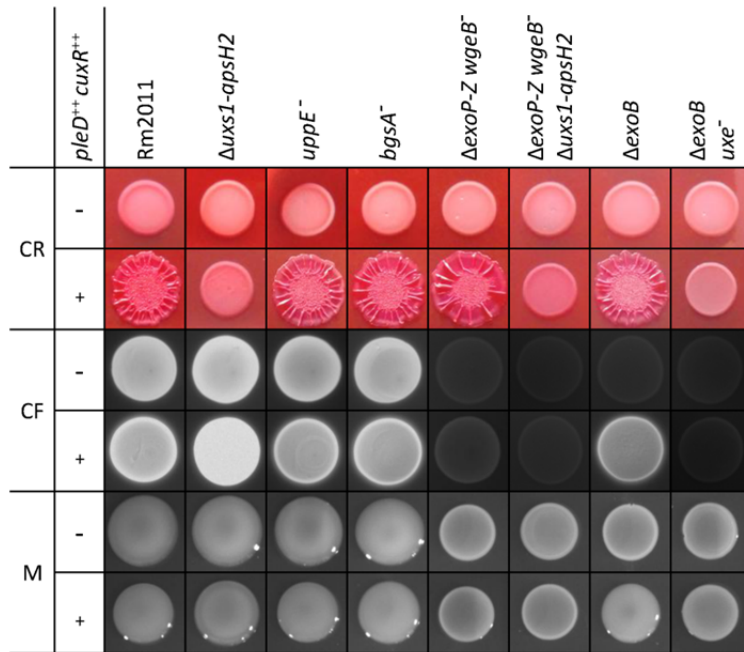

**Fig S5. APS production is independent of other c-di-GMP-regulated polysaccharides in *S. meliloti*.** *S. meliloti* Rm2011 wild type and indicated mutant strains, harboring either empty vector pWBT (-) or pWBT-*pleD-cuxR* (+), grown on Congo red (CR)-supplemented MM agar, Calcofluor (CF)-supplemented LB agar or phosphate-limiting MM agar to evaluate mucoidity (M). All media contained IPTG.

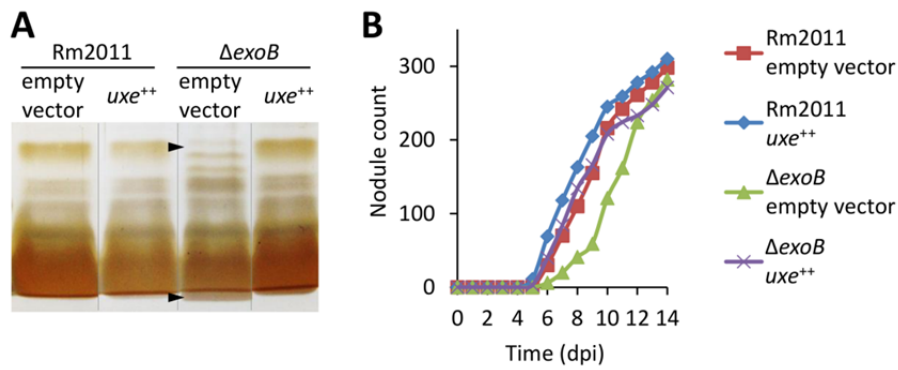

**Fig S6. *uxe* complements defects in LPS structure and plant nodulation of a *S. meliloti* *exoB* mutant.** (A) Silver-stained LPS separated in a 16% acrylamide gel and extracted from *S. meliloti* Rm2011 and  $\Delta\text{exoB}$ , both either harboring empty vector pSRK or constitutively expressing *uxe* from pSRK-*uxe*. Arrows indicate the slow migrating and fast migrating forms of *S. meliloti* LPS (corresponding to LPS profiles in 14).  $\Delta\text{exoB}$  manifested only the fast migrating band of LPS. (B) Total number of nodules on 48 *M. sativa* roots counted in one-day intervals after inoculation and for each bacterial strain described in panel A. dpi, days post-inoculation.

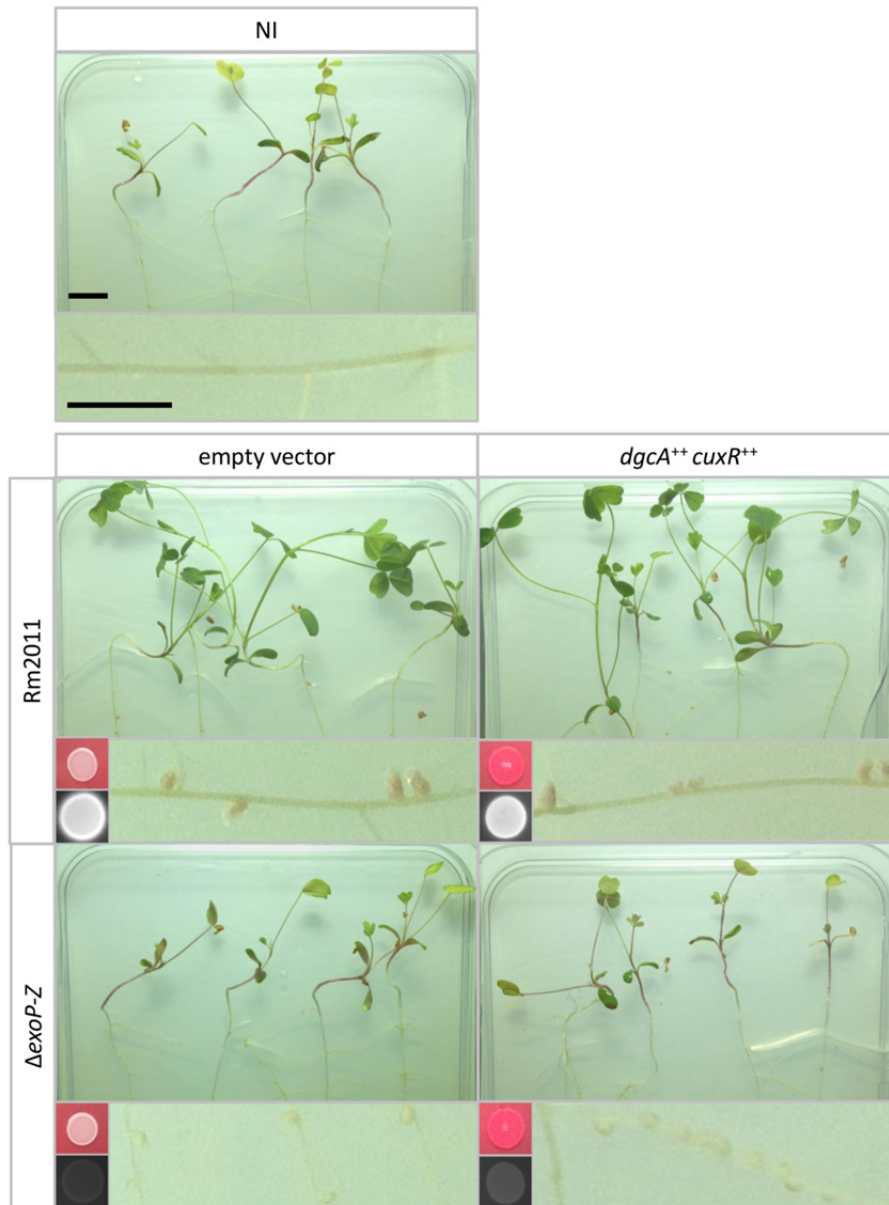

**Fig S7. Stimulated APS production does not suppress symbiotic phenotype of a succinoglycan-deficient *S. meliloti* mutant.** (A) Plant shoots and roots of *M. sativa* inoculated with Rm2011 wild type and *exoP-Z* deletion strains, carrying either empty vector pSM10 or pSM-*dgcA-cuxR*. Congo red- and Calcofluor-stained macro-colonies of these strains grown on TY agar and LB agar, respectively, are shown in addition. NI, not inoculated. Bars, 1 cm.



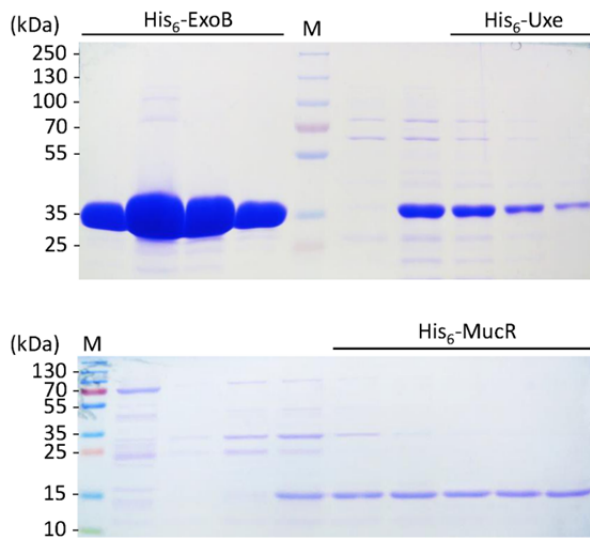

**Fig S8. SDS-PAGE analysis of purified proteins.** His<sub>6</sub>-ExoB, His<sub>6</sub>-Uxe and His<sub>6</sub>-MucR (respective calculated molecular weights: 37.4, 36.6 and 17.1 kDa) elution fractions resolved by SDS-PAGE and stained with Coomassie Brilliant Blue. Indicated fractions were pooled and used for *in vitro* reactions. M, protein size marker.

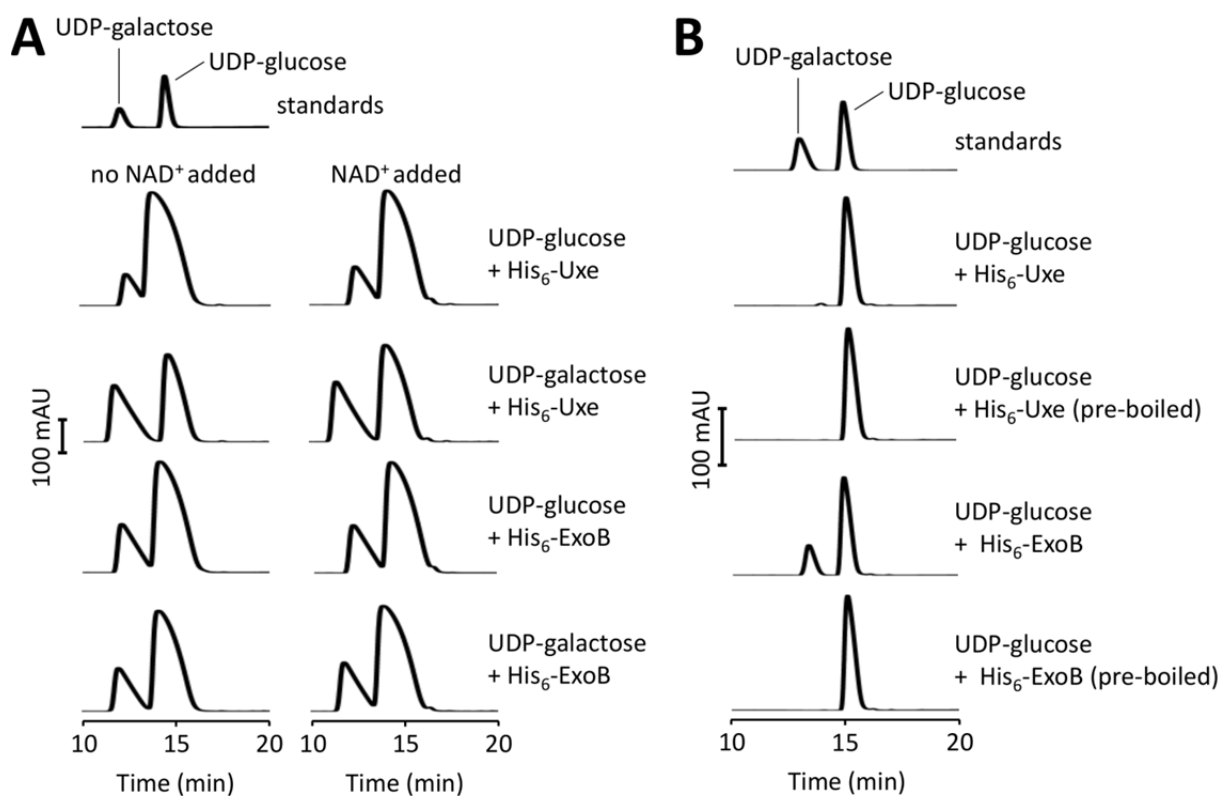

**Fig S9. Uxe UDP-glucose 4-epimerase activity *in vitro* under various reaction conditions.** (A) HPLC profiles of UDP-sugars after incubation of 1 mM of either UDP-glucose or UDP-galactose with 10  $\mu$ M of either His<sub>6</sub>-Uxe or His<sub>6</sub>-ExoB in presence or absence of 0.5 mM NAD<sup>+</sup> for 120 min at 30°C. (B) HPLC profiles of UDP-sugars after incubation of 0.5 mM UDP-glucose with 0.5  $\mu$ M of either His<sub>6</sub>-Uxe or His<sub>6</sub>-ExoB and in presence of 0.5 mM NAD<sup>+</sup> for 15 min at 37°C (corresponding to reaction conditions in 15). His<sub>6</sub>-ExoB served as positive control. UDP-glucose and UDP-galactose standards were used at 0.1 mM.

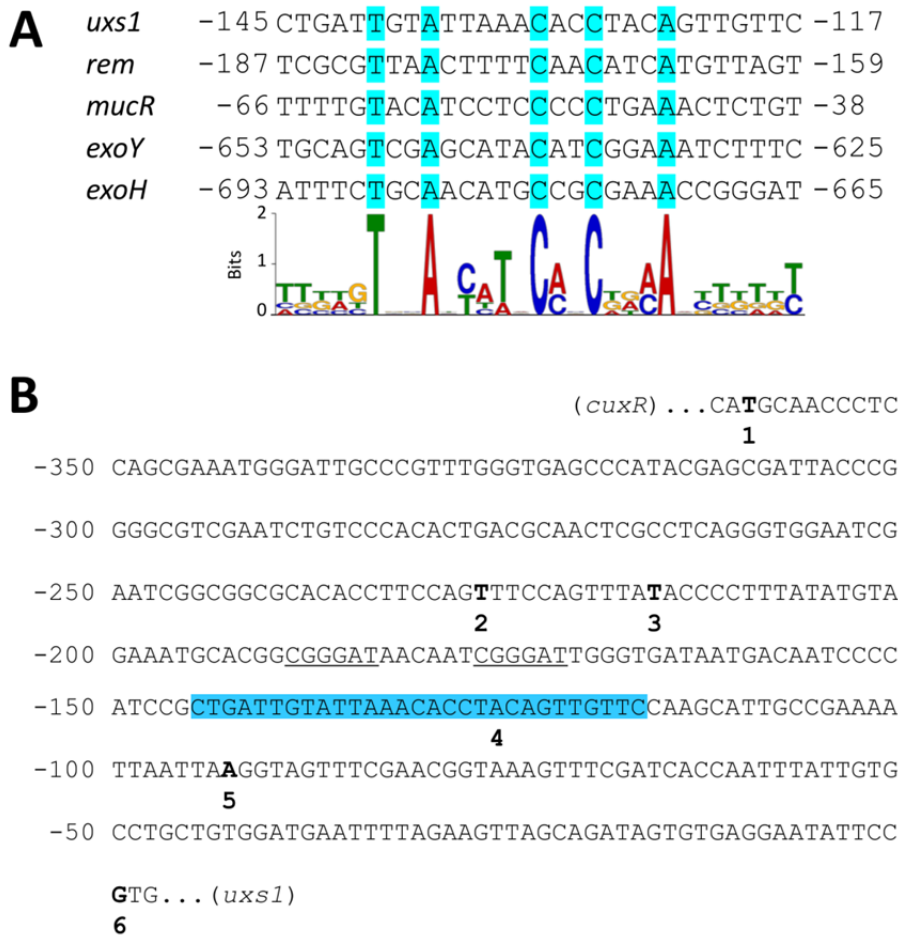

**Fig S10. *In silico*-deduced binding motif of MucR.** (A) Multiple sequence alignment of previously identified MucR binding sites (16) and a putative MucR binding site identified in the *cuxR-uxs1* intergenic region. DNA motif was generated with MEME. Numbers refer to the distance in nucleotides to the start codon of the corresponding genes. (B) Rm2011 genomic sequence between divergently transcribed *cuxR* and *uxs1* with indicated translational start sites, putative transcriptional start sites (TSS), a direct repeat element identified as CuxR binding site (underlined; 13) and the putative MucR binding site (shaded in blue). 1, *cuxR* translational start site. 2, *cuxR* putative TSS (17). 3, *cuxR* putative TSS (18). 4, *uxs1* putative TSS (19). 5, *uxs1* putative TSS (18). 6, *uxs1* translational start site.
